1 **A spectrum of recessiveness among Mendelian disease variants in UK Biobank**

2

3 Alison R. Barton,<sup>\*1,2,3</sup> Margaux L.A. Hujoel,<sup>1,2</sup> Ronen E. Mukamel,<sup>1,2</sup> Maxwell A. Sherman,<sup>1,2,4</sup> Po-Ru  
4 Loh<sup>\*1,2</sup>

5

6 1 Division of Genetics, Department of Medicine, Brigham and Women's Hospital and Harvard Medical  
7 School, Boston, MA, 02115, USA

8 2 Broad Institute of MIT and Harvard, Cambridge, MA, 02142, USA

9 3 Bioinformatics and Integrative Genomics Program, Department of Biomedical Informatics, Harvard  
10 Medical School, Boston, MA, 02115, USA

11 4 Computer Science and Artificial Intelligence Laboratory, Massachusetts Institute of Technology,  
12 Cambridge, MA, 02139, USA

13 \* Correspondence should be addressed to A.R.B. ([alisonbarton@g.harvard.edu](mailto:alisonbarton@g.harvard.edu)) or P.-R.L.  
14 ([poruloh@broadinstitute.org](mailto:poruloh@broadinstitute.org))

15

16 **Abstract**

17 Recent work has found increasing evidence of mitigated, incompletely penetrant phenotypes in  
18 heterozygous carriers of recessive Mendelian disease variants. We leveraged whole-exome imputation  
19 within the full UK Biobank cohort ( $N \sim 500K$ ) to extend such analyses to 3,481 rare variants curated from  
20 ClinVar and OMIM. Testing these variants for association with 57 quantitative traits yielded 103  
21 significant associations involving variants previously implicated in 35 different diseases. Notable  
22 examples included a *POR* missense variant implicated in Antley-Bixler syndrome that associated with a  
23 1.76 (s.e. 0.27) cm increase in height, and an *ABCA3* missense variant implicated in interstitial lung  
24 disease that associated with reduced FEV1/FVC ratio. Association analyses with 1,257 disease traits  
25 yielded five additional variant-disease associations. We also observed contrasting levels of  
26 recessiveness between two more-common, classical Mendelian diseases. Carriers of cystic fibrosis  
27 variants exhibited increased risk of several mitigated disease phenotypes, whereas carriers of spinal  
28 muscular atrophy alleles showed no evidence of altered phenotypes. Incomplete penetrance of cystic  
29 fibrosis carrier phenotypes did not appear to be mediated by common allelic variation on the functional

30 haplotype. Our results show that many disease-associated recessive variants can produce mitigated  
31 phenotypes in heterozygous carriers and motivate further work exploring penetrance mechanisms.

32

## 33 **Introduction**

34

35 Since the advent of next generation sequencing, the number of variants identified as contributing to  
36 Mendelian disease has grown rapidly<sup>1</sup>. Roughly 20% of all protein-coding genes in humans have been  
37 associated with at least one Mendelian disease<sup>2</sup>. Increasingly, studies of recessive disease variants  
38 have begun observing that these variants can sometimes cause mitigated phenotypes in heterozygous  
39 carriers, thereby contributing to population variation in complex traits and disease susceptibility<sup>3-11</sup>.  
40 However, the rarity of most such variants together with their unavailability in most SNP-array-based  
41 genotyping studies has limited attempts to explore this phenomenon at scale. Early work focused on  
42 smaller cohorts recruited for specific diseases, such as a series of studies that demonstrated increased  
43 risk of male infertility<sup>12,13</sup>, bronchiectasis<sup>14-16</sup>, and asthma<sup>15,17</sup> among other phenotypes in cystic fibrosis  
44 carriers. More recently, larger data sets have enabled extending the breadth of such analyses to more  
45 phenotypes<sup>4,5</sup> and to more recessive disease variants<sup>3</sup>.

46

47 With increasing exome sequencing of population biobank cohorts<sup>18-20</sup>, a new opportunity to search for  
48 carrier phenotypes in a phenome-wide, exome-wide manner has emerged. Furthermore, biobank data  
49 sets present an opportunity to ameliorate ascertainment biases by assessing phenotypes in population  
50 cohorts, complementing analyses of patients and their families. Family-based studies have been  
51 observed to be susceptible to ascertainment biases that inflate observed effects<sup>21</sup>, while the opposite  
52 “healthy volunteer” phenomenon has been observed in biobank cohorts<sup>22</sup>. Genome-wide genotyping  
53 and imputation in biobank data sets also provide opportunities to investigate potential genetic modifiers  
54 of incompletely penetrant carrier phenotypes<sup>23</sup>.

55

56 Here we leveraged exome-wide imputation within the UK Biobank cohort<sup>24</sup> to power a broad  
57 investigation of quantitative and disease phenotypes amongst carriers of recessive disease variants.  
58 Next, we performed a focused analysis of two relatively more common severe recessive Mendelian  
59 diseases, using the power afforded by high carrier frequencies to characterize carrier phenotypes or  
60 establish a truly recessive pattern of phenotypes. Finally, we considered the molecular mechanisms  
61 underlying incomplete penetrance observed amongst carriers, evaluating a previously proposed model  
62 of modified penetrance<sup>23</sup>.

63

## 64 **Subjects and methods**

65

### 66 **Imputed carriers of recessive Mendelian disease variants in UK Biobank**

67 We previously used the first tranche of whole exome sequencing data released by the UK Biobank  
68 ( $N=49,960$ )<sup>18</sup> to impute coding variants into SNP-array data available for  $N=487,409$  participants in the  
69 full UK Biobank cohort<sup>25</sup>, achieving accurate imputation of rare variant genotypes at minor allele  
70 frequencies (MAF) down to  $\sim 0.00005$ <sup>24</sup>. Here, we analyzed a subset of imputed variants that were  
71 annotated in ClinVar<sup>26</sup> as “pathogenic” or “likely pathogenic” for diseases annotated in OMIM<sup>2</sup> as  
72 “autosomal recessive”. We further restricted to rare variants ( $MAF < 0.01$ ) with a minimum MAF of  
73  $0.00001$  and estimated imputation accuracy of  $R^2 > 0.5$ , leaving 3,481 variants for analysis.

74

### 75 **Association tests with quantitative traits**

76 We tested imputed genotype dosages for association with 57 quantitative traits using linear mixed  
77 models implemented in BOLT-LMM v2.3.4. These traits included the 54 quantitative traits we previously  
78 analyzed<sup>24</sup> and three additional traits (skin pigmentation, tanning ability, and hair color). We performed  
79 quantitative trait association analyses on  $N=459,327$  UK Biobank participants who reported European

80 ancestry and had not withdrawn from the study at the time of analysis. We did not attempt to filter  
81 homozygotes or compound heterozygotes from these analyses, reasoning that such individuals would  
82 account for negligible numbers of carriers of the rare variants we analyzed (both based on allele  
83 frequencies and on the “healthy volunteer” ascertainment bias of UK Biobank).

84

### 85 **Association tests with binary traits**

86 We tested the same imputed variants for association with 1,139 binary disease phenotypes curated by  
87 UK Biobank. These consisted of the complete set of “first-occurrence” of disease traits in the UK  
88 Biobank converted to simple case and control status as well as the set of 8 “algorithmically defined  
89 health outcomes” disease categories provided by the UK Biobank. We tested variants for association  
90 with binary traits using the BinomiRare test<sup>27</sup> to obtain  $p$ -values robust to case-control imbalance while  
91 adjusting for age (stratified into five-year tranches) and sex. For computational efficiency, we re-  
92 implemented the BinomiRare test and applied a binomial approximation when the number of observed  
93 cases among carriers exceeded 100. We estimated odds ratios as  $xw / yz$ , where  $x$ ,  $y$ ,  $z$ ,  $w$  denote  
94 ratios of observed versus expected cases among carriers, cases among noncarriers, controls among  
95 carriers, and controls among noncarriers, respectively. We estimated 95% confidence intervals using a  
96 normal approximation, i.e., converting  $p$ -values to  $z$ -scores and then taking the 95% CI of the log odds  
97 ratio (OR) to be  $\log(\text{OR}) \pm 1.96 * \log\text{OR} / z$ . We performed association analyses on an unrelated  
98 subset of  $N=415,291$  UK Biobank participants who reported European ancestry and had not withdrawn  
99 from the study<sup>28</sup>.

100

### 101 **Analyses of cystic fibrosis carriers**

102 We identified cystic fibrosis carriers in UK Biobank using SNP-array genotypes for the Phe508del  
103 variant and (in auxiliary analyses) the missense SNP rs78655421, excluding participants with a cystic  
104 fibrosis report (according to the “first occurrences” data field). We applied the same analysis pipeline as

105 above to test for associations with the 1,139 binary traits and applied a significance threshold of FDR <  
106 5% ( $q$ -value < 0.05).

107

### 108 **Analyses of spinal muscular atrophy carriers**

109 We identified spinal muscular atrophy carriers in the UK Biobank  $N=200K$  exome sequencing release  
110 as individuals with evidence of only one functional copy of *SMN1*. We estimated the number of  
111 functional copies of each of *SMN1* and *SMN2* based on depth of coverage of exome sequencing reads  
112 that mapped uniquely to the exon 7-intron 7 region of each gene (chr5:70,951,800-70,952,600 for  
113 *SMN1* and chr5:70,076,400-70,077,100 for *SMN2* in hg38 coordinates; these regions contain four  
114 paralogous sequence variants that distinguish the highly homologous genes and were captured by  
115 exome sequencing). This approach accounted for deletions of exons 7-8 that commonly inactivate  
116 copies of *SMN2* and occasionally *SMN1*<sup>29</sup>. We computed exome sequencing read-depth using  
117 mosdepth v0.3.1<sup>30</sup> and normalized each sample's read-depth measurements against corresponding  
118 measurements from other samples with similar exome-wide sequencing depth profiles using a pipeline  
119 we recently described<sup>28</sup>.

120

121 We analyzed SMA carriers for evidence of changes in three traits related to neuromuscular function:  
122 walking speed, hand grip strength (maximum of left- and right-hand measurements), and FEV1 / FVC  
123 ratio (a measure of lung function). Using age, age squared, and sex as covariates, we performed linear  
124 regressions to test for an association between SMA carrier status and each trait.

125

### 126 **Testing a model of modified penetrance in carriers of loss-of-function variants**

127 To further investigate potential molecular mechanisms underlying why some recessive variant carriers  
128 display mild phenotypes but others do not, we considered a model of modified penetrance proposed by  
129 Castel *et al.* (2018)<sup>23</sup>. This model proposes that the penetrance of a deleterious variant can be affected  
130 by variants on the allele on the homologous chromosome, particularly in the case of common *cis*-

131 eQTLs that modulate expression of the functional copy of the gene. To evaluate this model, we  
132 analyzed heterozygous carriers of relatively common disease variants in two genes, *FLG* and *CFTR*.  
133 To perform association tests on variants carried on the haplotypes opposite the disease variants, we  
134 imputed variants from the Haplotype Reference Consortium panel (r1.1) using Minimac3 v2.0.1 (run on  
135 genomic windows including 3 Mb flanks of each gene) and analyzed these variants together with the  
136 variants we previously imputed from whole-exome sequencing<sup>24</sup>. Next, we extracted the genotypes for  
137 these carriers at variants within 1 Mb up- and downstream of each gene. We then recoded the  
138 genotypes for each carrier to be hemizygous for the alleles sitting on the haplotype opposite from the  
139 deleterious variant. We performed association tests on these recoded hemizygous variants using the  
140 Fisher's exact test implemented in plink (v1.9)<sup>31</sup> (--fisher-midp) (which could perform this analysis after  
141 we recoded the chromosome as "X" and coded all individuals as male). We assessed the power of  
142 these analyses to detect associations between common variants on the opposite haplotype using the  
143 wp.logistic function in the WebPower R package.

144

## 145 **Results**

146

### 147 **Quantitative phenotypes in carriers of recessive disease variants**

148 Testing 3,481 rare recessive disease variants for association with 57 quantitative traits measured in the  
149 UK Biobank identified 103 significant ( $p < 2.52 \times 10^{-7}$ ; Bonferroni-corrected) variant-trait associations  
150 (**Fig. 1** and **Table S1**). These associations involved variants reported to be pathogenic for 35 distinct  
151 recessive diseases. For many of these diseases (19/35 diseases), carriers exhibited significant  
152 deviations in multiple quantitative traits. Some of these multiple associations partly reflected correlated  
153 measurements of blood, lipid, or pigmentation traits, such as associations between a variant believed to  
154 cause Bernard-Soulier syndrome type C (a recessive bleeding disorder) and mean platelet volume  
155 ( $0.68 \pm 0.03$  SD), platelet distribution width ( $0.54 \pm 0.03$  SD), and platelet count ( $-0.65 \pm 0.03$  SD).

156 However, others pointed to distinct manifestations of pleiotropy such as associations of a variant for  
157 McArdle disease (a recessive glycogen storage disorder that interferes with muscle function) with both  
158 increased urate levels ( $0.15 \pm 0.02$  SD) and increased waist-hip ratio ( $0.10 \pm 0.02$  SD).

159

160 For some of the diseases, carriers exhibited traits that might be expected based on the known  
161 biological mechanisms of the disease, supporting the validity of our analytical approach. For example,  
162 when considering Mendelian disorders where the production of a particular protein or compound is  
163 altered, one might expect a carrier to have reduced levels of that same molecule. We observed this  
164 phenomenon with infantile hypophosphatasia, which is defined by errors in alkaline phosphatase<sup>32</sup>. In  
165 UK Biobank, carriers of several variants in the *ALPL* gene reported as pathogenic for recessive  
166 hypophosphatasia exhibited decreased alkaline phosphatase (ranging from  $-2.63 \pm 0.20$  SD to -  
167  $0.71 \pm 0.12$  SD) and increased phosphate, as might be expected. Another example involved two  
168 variants in *ANGPTL3* that have been implicated in hypobetalipoproteinemia 2, a recessive disorder in  
169 which individuals experience low levels of several lipid biomarkers<sup>33</sup>. Carriers showed decreases in  
170 apolipoprotein A levels ( $-0.56 \pm 0.04$  SD;  $-0.63 \pm 0.07$  SD), cholesterol levels ( $-0.52 \pm 0.04$  SD; -  
171  $0.52 \pm 0.07$  SD), and triglyceride levels ( $-0.67 \pm 0.04$  SD;  $-0.52 \pm 0.07$  SD).

172

173 Other diseases with more complex biological mechanisms yielded less straightforward carrier  
174 phenotypes. Here we highlight three such examples. First, a missense variant in *POR* implicated in  
175 Antley-Bixler syndrome<sup>34</sup>, a recessive skeletal disorder in which bones fuse prematurely, associated  
176 with a  $0.27 \pm 0.04$  SD increase in height (i.e.,  $1.76 \pm 0.27$  cm). Second, a frameshift variant in  
177 *ADAMTSL4* implicated in ectopia lentis 2, a recessive disorder of the fibers in the eyes that can lead to  
178 vision problems, associated with a  $0.13 \pm 0.02$  SD ( $0.84 \pm 0.12$  cm) decrease in height. Decreased height  
179 has been observed in patients with ectopia lentis 2, but the mechanism by which *ADAMTSL4* causes  
180 this change has not been extensively examined<sup>35</sup>. Third, a missense variant in *ABCA3* implicated in

181 pulmonary surfactant metabolism dysfunction 3, a recessive interstitial lung disease caused by  
182 disruptions in the surface tension of lung surfactant<sup>36</sup>, associated with a  $0.12 \pm 0.01$  SD decrease in  
183 FEV1/FVC ratio, a measure of lung function. These examples add to the growing body of evidence that  
184 rare variants that cause severe disease in homozygotes or compound heterozygotes can often produce  
185 mild, subclinical phenotypes in heterozygous carriers<sup>3,4</sup>.

186

### 187 **Disease phenotypes in heterozygous carriers of recessive variants**

188 We next tested the same set of 3,481 rare recessive disease variants for association with 1,139 binary  
189 traits in UK Biobank, identifying five associations that reached significance ( $p < 1.26 \times 10^{-8}$ ; Bonferroni-  
190 corrected) (**Table 1**). As with the quantitative traits, some associations were expected from previous  
191 literature. Carriers of a frameshift variant in *HBB* exhibited increased risk of thalassemia<sup>37</sup>, and carriers  
192 of a stop gain variant in *COL4A4* implicated in Alport syndrome 2, a recessive disorder that involves  
193 kidney dysfunction, exhibited increased risk of hematuria (OR=10.5; 95% CI, 5.2-21.2)<sup>38,39</sup>, as we and  
194 others have recently reported<sup>24,40,41</sup>. Carriers of a missense variant in *TYR* (tyrosinase) implicated in  
195 recessive oculocutaneous albinism type IA exhibited increased risk of disorders of aromatic amino-acid  
196 metabolism (OR=63.3; 95% CI, 16.3-245.1)<sup>42</sup>. A missense variant in *TG* (thyroglobulin) implicated in  
197 recessive thyroid dyshormonogenesis 3 increased risk of hypothyroidism in carriers (OR=2.20; 95% CI,  
198 1.68-2.88)<sup>43,44</sup>.

199

200 A more intriguing association involved a splice donor variant in *IFT140* previously implicated in  
201 recessive short-rib thoracic dysplasia 9 and retinitis pigmentosa 80, often with accompanying renal  
202 disease<sup>45,46</sup>. Carriers of this variant exhibited increased risk of cystic kidney disease (OR=18.4; 95% CI,  
203 8.5-40.1), corroborating recent findings from analyses of directly-sequenced individuals and imputation  
204 using the TOPMed reference panel<sup>47,48</sup>. Loss-of-function of both copies of *IFT140* appears to be  
205 inviable based on murine studies<sup>49</sup>, such that this canonical splice variant has been observed in cases  
206 of recessive disease only in compound heterozygotes with partial function of the other copy of the



207 gene<sup>50</sup>. While retinitis pigmentosa 80 primarily manifests in visual symptoms and recessive short-rib  
208 thoracic dysplasia 9 in skeletal symptoms, *IFT140* encodes a protein related to cilia function that also is  
209 expressed in the kidney, and renal symptoms have been noted in both diseases. The observed  
210 association between carriers of the splice variant and cystic kidney disease suggests partial  
211 haploinsufficiency of *IFT140* in its role in the kidney.

212

### 213 **Contrasting recessiveness of cystic fibrosis and spinal muscular atrophy**

214 In light of the diversity of autosomal recessive Mendelian diseases for which we observed mitigated  
215 phenotypes in carriers, we decided to more closely investigate two relatively common recessive  
216 Mendelian diseases to ask whether mitigated phenotypes were a ubiquitous feature of recessive  
217 disease carriers. To do so, we identified diseases with sufficiently high carrier frequencies in UK  
218 Biobank that we would be well-powered to identify mitigated carrier phenotypes or lack thereof. The two  
219 diseases we identified based on these criteria were cystic fibrosis (CF) and spinal muscular atrophy  
220 (SMA).

221

222 Previous studies have identified mitigated phenotypes in carriers of cystic fibrosis variants related to  
223 phenotypic manifestations of the disease<sup>4,5</sup>. To further explore the extent of this phenomenon utilizing  
224 the deep phenotyping of UK Biobank, we tested our full set of quantitative and binary traits for  
225 associations with carriers of the most common CF mutation, *CFTR* Phe508del (MAF=1.6%), which was  
226 directly genotyped by UK Biobank SNP-arrays. Carriers of this variant showed significant associations  
227 ( $q$ -value < 0.05) with asthma (OR=1.12; 95% CI,1.06-1.17), aspergillosis (OR=2.60; 95% CI,1.63-4.13),  
228 bronchiectasis (OR=1.40; 95% CI,1.20-1.61), and duodenal ulcer (OR=1.30; 95% CI,1.15-1.45) (**Fig.**  
229 **2a** and **Table S2**). Four additional associations reached significance at a relaxed FDR threshold of  
230 10%: COPD (OR=1.17; 95% CI 1.07-1.27), cholelithiasis (OR=1.13; 95% CI 1.06-1.22), male infertility  
231 (OR=2.10; 95% CI,1.40-3.15), and other prostate disorders (OR=1.39; 95% CI 1.15-1.67) (**Table S2**).

232 We also tested carriers of the next most common cystic fibrosis mutation, *CFTR* Arg117His  
233 (MAF=0.2% in UK Biobank) but concluded that power was insufficient (**Table S2**).

234  
235 The odds ratios we calculated for carriers of Phe508del, while significant, were much smaller than  
236 those recently reported in an analysis of CF carriers ascertained from a database of insurance claims  
237 from individuals who had been tested for carrier status<sup>4</sup> (**Fig. S1**). Furthermore, several reported  
238 associations did not replicate in our analysis of UK Biobank. For example, whereas the claims analysis  
239 showed a strong association between carrier status and short stature<sup>4</sup>, we did not observe an  
240 association between Phe508del carrier status and height in UK Biobank despite ample power (effect  
241 size =  $-0.000 \pm 0.006$  SD). The odds ratios we computed were more consistent with those reported by  
242 Çolak et al. (2020) using Phe508del genotyping in the Copenhagen General Population Study<sup>5</sup>. These  
243 results underscore the importance of understanding issues of ascertainment bias when studying  
244 penetrance in population studies<sup>51–53</sup>.

245  
246 In contrast to CF, potential phenotypes of SMA carriers have not (to our knowledge) previously been  
247 explored, in part because of the difficulty of genotyping SMA carrier mutations, most of which arise from  
248 structural variation at the *SMN1–SMN2* locus<sup>29,54</sup>. SMA is usually caused by loss-of-function mutations  
249 in both copies of the *SMN1* gene, with disease severity then determined by the number of functional  
250 copies of the paralogous *SMN2* gene. The availability of whole-exome sequencing (WES) data for  
251  $N \sim 200K$  UK Biobank participants<sup>19</sup> enabled us to estimate the number of functional copies of *SMN1*  
252 and *SMN2* in each sequenced sample from WES depth-of-coverage (**Fig. 2b**). We ascertained 3,462  
253 SMA carriers (i.e., individuals likely to carry only one functional copy of *SMN1*) in this way from the set  
254 whole-exome sequenced individuals of European-ancestry ( $N=187,720$ ). Interestingly, we found no  
255 significant associations between SMA carrier status and potential manifestations of muscle weakness –  
256 walking speed, grip strength, and FEV1/FVC ratio (**Fig. 2c**) – even when stratifying for *SMN2* copy  
257 number (**Table S3**). These results suggest that SMA is a truly recessive disease in which muscle

258 weakness phenotypes only manifest in individuals who carry two *SMN1* alleles inactivated by loss-of-  
259 function variants.

260

### 261 **Testing a model of modified penetrance**

262 In all the instances in which we observed mitigated phenotypes in carriers of recessive disease  
263 variants, the associated phenotypes exhibited variable penetrance in heterozygotes. We therefore  
264 sought to explore the possible molecular mechanisms underlying this incomplete penetrance.

265

266 Castel *et al.* (2018) previously proposed a model of modified penetrance in which the haplotype  
267 arrangement of loss-of-function and expression-modifying variants in an individual might affect overall  
268 phenotype (**Fig. 3a**)<sup>23</sup>. In this model, the phenotypic impact of a deleterious variant inactivating one  
269 copy of a gene is mediated by the amount of expression of the functional copy (on the opposite  
270 haplotype), such that a common *cis*-eQTL influencing expression of the functional allele can influence  
271 the severity of the phenotype. Explicitly, if the *cis*-eQTL increases expression of the functional, wildtype  
272 protein, this could partially ameliorate the loss of the other copy; in contrast, if the *cis*-eQTL decreases  
273 expression of the functional copy, one might expect the carrier to have a more severe phenotype.

274

275 To explore this hypothesis, we considered two genes, *FLG* and *CFTR*, in which variants known to  
276 cause both recessive disease and produce mitigated phenotypes in carriers are sufficiently common to  
277 power analysis. Loss-of-function variants in *FLG* are known to cause ichthyosis vulgaris in  
278 homozygotes or compound heterozygotes, and carrier status has been associated with asthma and  
279 atopic dermatitis<sup>55,56</sup>. In UK Biobank, 10.3% of participants carried a loss-of-function variant in *FLG* that  
280 was associated with asthma or atopic dermatitis in heterozygotes. As discussed in the previous section,  
281 mutations in *CFTR* are responsible for cystic fibrosis, as well as several mitigated phenotypes in  
282 carriers. Approximately 3.1% of individuals in the UK Biobank are carriers for the Phe508del mutation in  
283 *CFTR* that we considered for this analysis.

284

285 To determine whether variants on the opposite (putatively functional) haplotype in carriers might affect  
286 their susceptibility to mitigated phenotypes, we restricted our analysis just to carriers of these  
287 deleterious variants (**Fig. 3b**). For each nearby variant at each locus, we then ran an association test  
288 between opposite-haplotype genotypes and mitigated phenotypes. No tested variant at either locus  
289 significantly associated with phenotype (**Fig. 3c**). Given that we were well-powered to detect common  
290 variant associations with an odds ratio >1.2 in both scenarios (**Fig. 3d**), these results suggest that the  
291 modified penetrance model is unlikely to underlie incomplete penetrance of these carrier phenotypes.

292

## 293 **Discussion**

294

295 Our results demonstrate that for a wide range of Mendelian diseases, variants traditionally considered  
296 to be recessive can cause milder phenotypes in heterozygous carriers. We also observed that entirely  
297 recessive effects do exist: heterozygous carriers for spinal muscular atrophy exhibited no evidence of  
298 even a subtle effect on phenotypes related to muscle strength. These observations suggest a spectrum  
299 of recessiveness that is now becoming visible in very large population cohorts.

300

301 Our study did have several limitations. First, even with the large sample size provided by exome  
302 sequencing in UK Biobank, we still lacked power to assess potential effects of many very rare variants  
303 that are known to cause Mendelian recessive diseases. Second, our examination of potential  
304 interactions between variants on opposite haplotypes was even more power-constrained, such that we  
305 could only assess this model for two diseases involving common variants. Third, the effects we  
306 estimated are likely to be influenced by the “healthy volunteer” ascertainment bias observed in analyses  
307 of population biobank cohorts<sup>22</sup>.

308

309 As even larger, well-phenotyped cohorts with whole-exome or whole-genome sequencing become  
310 available, our ability to determine the extent of mild carrier phenotypes will increase. More  
311 comprehensive phenome-wide and genome-wide studies will allow for an assessment of how common  
312 the phenomenon of incomplete recessivity is amongst severe Mendelian diseases and the spectrum of  
313 phenotypes that can manifest. Moreover, the higher power afforded by extremely large studies will also  
314 enable more extensive exploration of potential interactions between variants that could help to explain  
315 incomplete penetrance and shed light on the molecular mechanisms that underlie mitigated  
316 phenotypes.  
317

318 **Supplemental data** include one figure and three tables.

319

### 320 **Acknowledgments**

321 We thank A. Gusev, A. Price and S. Sunyaev for helpful discussions. This research was conducted  
322 using the UK Biobank Resource under application no. 10438. A.R.B. was supported by US NIH grant  
323 T32 HG229516 and fellowship F31 HL154537. M.L.A.H. was supported by US NIH fellowship F32  
324 HL160061. M.A.S. was supported by the MIT John W. Jarve (1978) Seed Fund for Science Innovation  
325 and US NIH fellowship F31 MH124393. R.E.M. was supported by US NIH grant K25 HL150334 and  
326 NSF grant DMS-1939015. P.-R.L. was supported by US NIH grant DP2 ES030554, a Burroughs  
327 Wellcome Fund Career Award at the Scientific Interfaces, the Next Generation Fund at the Broad  
328 Institute of MIT and Harvard, and a Sloan Research Fellowship. The funders had no role in study  
329 design, data collection and analysis, decision to publish or preparation of the manuscript.  
330 Computational analyses were performed on the O2 High Performance Compute Cluster, supported by  
331 the Research Computing Group, at Harvard Medical School (<http://rc.hms.harvard.edu>).

332

### 333 **Declaration of interests**

334 The authors declare no competing interests.

335

### 336 **Data and code availability**

337 Access to the UK Biobank Resource is available by application (<http://www.ukbiobank.ac.uk/>). BOLT-  
338 LMM (v2.3.4) is available at <https://data.broadinstitute.org/alkesgroup/BOLT-LMM/>. mosdepth (v0.3.1)  
339 is available at <https://github.com/brentp/mosdepth>. Minimac4 (v.1.0.1) is available at  
340 <https://genome.sph.umich.edu/wiki/Minimac4>. plink (v1.9) is available from [https://www.cog-  
342 genomics.org/plink1.9/](https://www.cog-<br/>341 genomics.org/plink1.9/).

342

343

344 **Web resources**

345 ClinVar, <https://www.ncbi.nlm.nih.gov/clinvar/>

346 OMIM, <https://omim.org/>

347

348 **References**

349 1. Bamshad, M.J., Ng, S.B., Bigham, A.W., Tabor, H.K., Emond, M.J., Nickerson, D.A., and Shendure,  
350 J. (2011). Exome sequencing as a tool for Mendelian disease gene discovery. *Nat. Rev. Genet.* *12*, 745–  
351 755.

352 2. Hamosh, A., Amberger, J.S., Bocchini, C., Scott, A.F., and Rasmussen, S.A. (2021). Online  
353 Mendelian Inheritance in Man (OMIM®): Victor McKusick’s magnum opus. *Am. J. Med. Genet. A*  
354 *185*, 3259–3265.

355 3. Wright, C.F., West, B., Tuke, M., Jones, S.E., Patel, K., Laver, T.W., Beaumont, R.N., Tyrrell, J.,  
356 Wood, A.R., Frayling, T.M., et al. (2019). Assessing the Pathogenicity, Penetrance, and Expressivity of  
357 Putative Disease-Causing Variants in a Population Setting. *Am. J. Hum. Genet.* *104*, 275–286.

358 4. Miller, A.C., Comellas, A.P., Hornick, D.B., Stoltz, D.A., Cavanaugh, J.E., Gerke, A.K., Welsh, M.J.,  
359 Zabner, J., and Polgreen, P.M. (2020). Cystic fibrosis carriers are at increased risk for a wide range of  
360 cystic fibrosis-related conditions. *Proc. Natl. Acad. Sci. U.S.A.* *117*, 1621–1627.

361 5. Çolak, Y., Nordestgaard, B.G., and Afzal, S. (2020). Morbidity and mortality in carriers of the cystic  
362 fibrosis mutation *CFTR* Phe508del in the general population. *Eur. Respir. J.* *56*, 2000558.

363 6. Mäkitie, O., Pereira, R.C., Kaitila, I., Turan, S., Bastepe, M., Laine, T., Kröger, H., Cole, W.G., and  
364 Jüppner, H. (2010). Long-term clinical outcome and carrier phenotype in autosomal recessive  
365 hypophosphatemia caused by a novel *DMP1* mutation. *J. Bone Miner. Res.* *25*, 2165–2174.

366 7. Dagher, H., Buzza, M., Colville, D., Jones, C., Powell, H., Fassett, R., Wilson, D., Agar, J., and  
367 Savige, J. (2001). A comparison of the clinical, histopathologic, and ultrastructural phenotypes in  
368 carriers of X-linked and autosomal recessive Alport’s syndrome. *Am. J. Kidney Dis.* *38*, 1217–1228.

369 8. Watts, J.A., Morley, M., Burdick, J.T., Fiori, J.L., Ewens, W.J., Spielman, R.S., and Cheung, V.G.  
370 (2002). Gene expression phenotype in heterozygous carriers of ataxia telangiectasia. *Am. J. Hum.*  
371 *Genet.* *71*, 791–800.

372 9. Sidransky, E., Nalls, M.A., Aasly, J.O., Aharon-Peretz, J., Annesi, G., Barbosa, E.R., Bar-Shira, A.,  
373 Berg, D., Bras, J., Brice, A., et al. (2009). Multicenter analysis of glucocerebrosidase mutations in  
374 Parkinson’s disease. *N. Engl. J. Med.* *361*, 1651–1661.

375 10. Vieira, S.R.L., and Morris, H.R. (2021). Neurodegenerative Disease Risk in Carriers of Autosomal  
376 Recessive Disease. *Front. Neurol.* *12*, 679927–679927.

- 377 11. Perez, Y., Wormser, O., Sadaka, Y., Birk, R., Narkis, G., and Birk, O.S. (2017). A Rare Variant in  
378 *PGAP2* Causes Autosomal Recessive Hyperphosphatasia with Mental Retardation Syndrome, with a  
379 Mild Phenotype in Heterozygous Carriers. *Biomed. Res. Int.* 2017, 3470234.
- 380 12. Chillón, M., Casals, T., Mercier, B., Bassas, L., Lissens, W., Silber, S., Romey, M.-C., Ruiz-  
381 Romero, J., Verlingue, C., Claustres, M., et al. (1995). Mutations in the Cystic Fibrosis Gene in Patients  
382 with Congenital Absence of the Vas Deferens. *N. Engl. J. Med.* 332, 1475–1480.
- 383 13. Yu, J., Chen, Z., Ni, Y., and Li, Z. (2012). *CFTR* mutations in men with congenital bilateral absence  
384 of the vas deferens (CBAVD): a systemic review and meta-analysis. *Hum. Reprod.* 27, 25–35.
- 385 14. Girodon, E., Cazeneuve, C., Lebargy, F., Chinet, T., Costes, B., Ghanem, N., Martin, J., Lemay, S.,  
386 Scheid, P., Housset, B., et al. (1997). *CFTR* gene mutations in adults with disseminated bronchiectasis.  
387 *Eur. J. Hum. Genet.* 5, 149–155.
- 388 15. Tzetis, M., Efthymiadou, A., Strofalis, S., Psychou, P., Dimakou, A., Pouliou, E., Doudounakis, S.,  
389 and Kanavakis, E. (2001). *CFTR* gene mutations – including three novel nucleotide substitutions – and  
390 haplotype background in patients with asthma, disseminated bronchiectasis and chronic obstructive  
391 pulmonary disease. *Hum. Genet.* 108, 216–221.
- 392 16. Casals, T., De-Gracia, J., Gallego, M., Dorca, J., Rodríguez-Sanchón, B., Ramos, M., Giménez, J.,  
393 Cisteró-Bahima, A., Oliveira, C., and Estivill, X. (2004). Bronchiectasis in adult patients: an expression  
394 of heterozygosity for *CFTR* gene mutations? *Clin. Genet.* 65, 490–495.
- 395 17. Nielsen, A.O., Qayum, S., Bouchelouche, P.N., Laursen, L.C., Dahl, R., and Dahl, M. (2016). Risk  
396 of asthma in heterozygous carriers for cystic fibrosis: A meta-analysis. *J. Cyst. Fibros.* 15, 563–567.
- 397 18. Van Hout, C.V., Tachmazidou, I., Backman, J.D., Hoffman, J.D., Liu, D., Pandey, A.K., Gonzaga-  
398 Jauregui, C., Khalid, S., Ye, B., Banerjee, N., et al. (2020). Exome sequencing and characterization of  
399 49,960 individuals in the UK Biobank. *Nature* 586, 749–756.
- 400 19. Szustakowski, J.D., Balasubramanian, S., Kvikstad, E., Khalid, S., Bronson, P.G., Sasson, A., Wong,  
401 E., Liu, D., Wade Davis, J., Haefliger, C., et al. (2021). Advancing human genetics research and drug  
402 discovery through exome sequencing of the UK Biobank. *Nat. Genet.* 53, 942–948.
- 403 20. Backman, J.D., Li, A.H., Marcketta, A., Sun, D., Mbatchou, J., Kessler, M.D., Benner, C., Liu, D.,  
404 Locke, A.E., Balasubramanian, S., et al. (2021). Exome sequencing and analysis of 454,787 UK  
405 Biobank participants. *Nature* 599, 628–634.
- 406 21. Cooper, D.N., Krawczak, M., Polychronakos, C., Tyler-Smith, C., and Kehrer-Sawatzki, H. (2013).  
407 Where genotype is not predictive of phenotype: towards an understanding of the molecular basis of  
408 reduced penetrance in human inherited disease. *Hum. Genet.* 132, 1077–1130.
- 409 22. Fry, A., Littlejohns, T.J., Sudlow, C., Doherty, N., Adamska, L., Sprosen, T., Collins, R., and Allen,  
410 N.E. (2017). Comparison of Sociodemographic and Health-Related Characteristics of UK Biobank  
411 Participants With Those of the General Population. *Am. J. Epidemiol.* 186, 1026–1034.



- 412 23. Castel, S.E., Cervera, A., Mohammadi, P., Aguet, F., Reverter, F., Wolman, A., Guigo, R., Iossifov,  
413 I., Vasileva, A., and Lappalainen, T. (2018). Modified penetrance of coding variants by cis-regulatory  
414 variation contributes to disease risk. *Nat. Genet.* *50*, 1327–1334.
- 415 24. Barton, A.R., Sherman, M.A., Mukamel, R.E., and Loh, P.-R. (2021). Whole-exome imputation  
416 within UK Biobank powers rare coding variant association and fine-mapping analyses. *Nat. Genet.* *53*,  
417 1260–1269.
- 418 25. Bycroft, C., Freeman, C., Petkova, D., Band, G., Elliott, L.T., Sharp, K., Motyer, A., Vukcevic, D.,  
419 Delaneau, O., O’Connell, J., et al. (2018). The UK Biobank resource with deep phenotyping and  
420 genomic data. *Nature* *562*, 203–209.
- 421 26. Landrum, M.J., Lee, J.M., Benson, M., Brown, G.R., Chao, C., Chitipiralla, S., Gu, B., Hart, J.,  
422 Hoffman, D., Jang, W., et al. (2018). ClinVar: improving access to variant interpretations and supporting  
423 evidence. *Nucleic Acids Res.* *46*, D1062–D1067.
- 424 27. Sofer, T. (2017). BinomiRare: a robust test of the association of a rare-variant with a disease for  
425 pooled and meta-analysis, with application to the HCHS/SOL. *Genet. Epidemiol.* *41*, 388–395.
- 426 28. Mukamel, R.E., Handsaker, R.E., Sherman, M.A., Barton, A.R., Zheng, Y., McCarroll, S.A., and  
427 Loh, P.-R. (2021). Protein-coding repeat polymorphisms strongly shape diverse human phenotypes.  
428 *Science* *373*, 1499–1505.
- 429 29. Chen, X., Sanchis-Juan, A., French, C.E., Connell, A.J., Delon, I., Kingsbury, Z., Chawla, A.,  
430 Halpern, A.L., Taft, R.J., Bentley, D.R., et al. (2020). Spinal muscular atrophy diagnosis and carrier  
431 screening from genome sequencing data. *Genet. Med.* *22*, 945–953.
- 432 30. Brent S. Pedersen, and Quinlan, A.R. (2018). Mosdepth: quick coverage calculation for genomes  
433 and exomes. *Bioinformatics* *34*, Pages 867-868.
- 434 31. Chang, C.C., Chow, C.C., Tellier, L.C., Vattikuti, S., Purcell, S.M., and Lee, J.J. (2015). Second-  
435 generation PLINK: rising to the challenge of larger and richer datasets. *GigaScience* *4*, s13742-015-  
436 0047–0048.
- 437 32. Weiss, M.J., Cole, D.E., Ray, K., Whyte, M.P., Lafferty, M.A., Mulivor, R.A., and Harris, H.  
438 (1988). A missense mutation in the human liver/bone/kidney alkaline phosphatase gene causing a lethal  
439 form of hypophosphatasia. *Proc. Natl. Acad. Sci. U.S.A.* *85*, 7666–7669.
- 440 33. Musunuru, K., Pirruccello, J.P., Do, R., Peloso, G.M., Guiducci, C., Sougnez, C., Garimella, K.V.,  
441 Fisher, S., Abreu, J., Barry, A.J., et al. (2010). Exome Sequencing, *ANGPTL3* Mutations, and Familial  
442 Combined Hypolipidemia. *N. Engl. J. Med.* *363*, 2220–2227.
- 443 34. Flück, C.E., Tajima, T., Pandey, A.V., Arlt, W., Okuhara, K., Verge, C.F., Jabs, E.W., Mendonça,  
444 B.B., Fujieda, K., and Miller, W.L. (2004). Mutant P450 oxidoreductase causes disordered  
445 steroidogenesis with and without Antley-Bixler syndrome. *Nat. Genet.* *36*, 228–230.

- 446 35. Neuhann, T.M., Stegerer, A., Riess, A., Blair, E., Martin, T., Wieser, S., Kläs, R., Bouman, A.,  
447 Kuechler, A., and Rittinger, O. (2015). *ADAMTSL4*-associated isolated ectopia lentis: Further patients,  
448 novel mutations and a detailed phenotype description. *Am. J. Med. Genet. A* *167*, 2376–2381.
- 449 36. Shulenin, S., Noguee, L.M., Annilo, T., Wert, S.E., Whitsett, J.A., and Dean, M. (2004). *ABCA3* Gene  
450 Mutations in Newborns with Fatal Surfactant Deficiency. *N. Engl. J. Med.* *350*, 1296–1303.
- 451 37. Taher, A.T., Musallam, K.M., and Cappellini, M.D. (2021).  $\beta$ -Thalassemias. *N. Engl. J. Med.* *384*,  
452 727–743.
- 453 38. Longo, I., Porcedda, P., Mari, F., Giachino, D., Meloni, I., Deplano, C., Brusco, A., Bosio, M.,  
454 Massella, L., Lavoratti, G., et al. (2002). *COL4A3/COL4A4* mutations: From familial hematuria to  
455 autosomal-dominant or recessive Alport syndrome. *Kidney Int.* *61*, 1947–1956.
- 456 39. Buzza, M., Wang, Y.Y., Dagher, H., Babon, J.J., Cotton, R.G., Powell, H., Dowling, J., and Savige,  
457 J. (2001). *COL4A4* mutation in thin basement membrane disease previously described in Alport  
458 syndrome1. *Kidney Int.* *60*, 480–483.
- 459 40. Yang, C., Song, Y., Chen, Z., Yuan, X., Chen, X., Ding, G., Guan, Y., McGrath, M., Song, C., Tong,  
460 Y., et al. (2019). A Nonsense Mutation in *COL4A4* Gene Causing Isolated Hematuria in Either  
461 Heterozygous or Homozygous State. *Front. Genet.* *10*, 628.
- 462 41. Sinnott-Armstrong, N., Tanigawa, Y., Amar, D., Mars, N., Benner, C., Aguirre, M., Venkataraman,  
463 G.R., Wainberg, M., Ollila, H.M., Kiiskinen, T., et al. (2021). Genetics of 35 blood and urine  
464 biomarkers in the UK Biobank. *Nat. Genet.* *53*, 185–194.
- 465 42. Grønskov, K., Ek, J., and Brøndum-Nielsen, K. (2007). Oculocutaneous albinism. *Orphanet J. Rare*  
466 *Dis.* *2*, 43.
- 467 43. Ieiri, T., Cochaux, P., Targovnik, H.M., Suzuki, M., Shimoda, S., Perret, J., and Vassart, G. (1991).  
468 A 3' splice site mutation in the thyroglobulin gene responsible for congenital goiter with  
469 hypothyroidism. *J. Clin. Invest.* *88*, 1901–1905.
- 470 44. Grasberger, H., and Refetoff, S. (2011). Genetic causes of congenital hypothyroidism due to  
471 dysmorphogenesis. *Curr. Opin. Pediatr.* *23*, 421–428.
- 472 45. Perrault, I., Saunier, S., Hanein, S., Filhol, E., Bizet, A.A., Collins, F., Salih, M.A.M., Gerber, S.,  
473 Delphin, N., Bigot, K., et al. (2012). Mainzer-Saldino syndrome is a ciliopathy caused by *IFT140*  
474 mutations. *Am. J. Hum. Genet.* *90*, 864–870.
- 475 46. Schmidts, M., Frank, V., Eisenberger, T., al Turki, S., Bizet, A.A., Antony, D., Rix, S., Decker, C.,  
476 Bachmann, N., Bald, M., et al. (2013). Combined NGS Approaches Identify Mutations in the  
477 Intraflagellar Transport Gene *IFT140* in Skeletal Ciliopathies with Early Progressive Kidney Disease.  
478 *Hum. Mutat.* *34*, 714–724.
- 479 47. Taliun, D., Harris, D.N., Kessler, M.D., Carlson, J., Szpiech, Z.A., Torres, R., Taliun, S.A.G.,  
480 Corvelo, A., Gogarten, S.M., Kang, H.M., et al. (2021). Sequencing of 53,831 diverse genomes from the  
481 NHLBI TOPMed Program. *Nature* *590*, 290–299.

- 482 48. Senum, S.R., Li, Y. (Sabrina) M., Benson, K.A., Joli, G., Olinger, E., Lavu, S., Madsen, C.D.,  
483 Gregory, A.V., Neatu, R., Kline, T.L., et al. (2021). Monoallelic *IFT140* pathogenic variants are an  
484 important cause of the autosomal dominant polycystic kidney-spectrum phenotype. *Am. J. Hum. Genet.*
- 485 49. Jonassen, J.A., SanAgustin, J., Baker, S.P., and Pazour, G.J. (2012). Disruption of IFT Complex A  
486 Causes Cystic Kidneys without Mitotic Spindle Misorientation. *J. Am. Soc. Nephrol.* 23, 641–651.
- 487 50. Online Mendelian Inheritance in Man, OMIM® (2019). MIM Number 614620. (Baltimore, MD:  
488 Johns Hopkins University).
- 489 51. Ganguli, M., Lytle, M.E., Reynolds, M.D., and Dodge, H.H. (1998). Random versus volunteer  
490 selection for a community-based study. *J. Gerontol. A Biol. Sci. Med. Sci.* 53, M39-46.
- 491 52. Mirshahi, U.L., Colclough, K., Wright, C.F., Wood, A.R., Beaumont, R.N., Tyrrell, J., Laver, T.W.,  
492 Stahl, R., Golden, A., Goehringer, J.M., et al. (2021). The penetrance of age-related monogenic disease  
493 depends on ascertainment context. *MedRxiv* 2021.06.28.21259641.
- 494 53. Forrest, I.S., Chaudhary, K., Vy, H.M.T., Bafna, S., Jordan, D.M., Rocheleau, G., Loos, R.J.F., Cho,  
495 J.H., and Do, R. (2021). Ancestrally and Temporally Diverse Analysis of Penetrance of Clinical  
496 Variants in 72,434 Individuals. *MedRxiv* 2021.03.11.21253430.
- 497 54. Alías, L., Bernal, S., Fuentes-Prior, P., Barceló, M.J., Also, E., Martínez-Hernández, R., Rodríguez-  
498 Alvarez, F.J., Martín, Y., Aller, E., Grau, E., et al. (2009). Mutation update of spinal muscular atrophy in  
499 Spain: molecular characterization of 745 unrelated patients and identification of four novel mutations in  
500 the *SMN1* gene. *Hum. Genet.* 125, 29–39.
- 501 55. Weidinger, S., O’Sullivan, M., Illig, T., Baurecht, H., Depner, M., Rodriguez, E., Ruether, A.,  
502 Klopp, N., Vogelberg, C., Weiland, S.K., et al. (2008). Filaggrin mutations, atopic eczema, hay fever,  
503 and asthma in children. *J. Allergy Clin. Immunol.* 121, 1203-1209.e1.
- 504 56. Wang, Q., Dhindsa, R.S., Carss, K., Harper, A., Nag, A., Tachmazidou, I., Vitsios, D., Deevi, S.V.,  
505 Mackay, A., Muthas, D., et al. (2020). Surveying the contribution of rare variants to the genetic  
506 architecture of human disease through exome sequencing of 177,882 UK Biobank participants. *BioRxiv*  
507 2020.12.13.422582.

508

## 509 Figures

510

### 511 Figure 1. Carriers of recessive Mendelian disease variants display quantitative phenotypes.

512 Mendelian diseases and their associated genes are listed to the left in each column, and the mean  
 513 effect size is plotted on the right for each associated quantitative trait in units of standard deviation  
 514 (error bars, 95% CIs). Positive-effect variants are shown in red, negative-effect variants in blue, and  
 515 variants not Bonferroni-significant for one of the displayed traits in gray. Marker shapes correspond to  
 516 effects on the gene and gene product as reported in ClinVar.

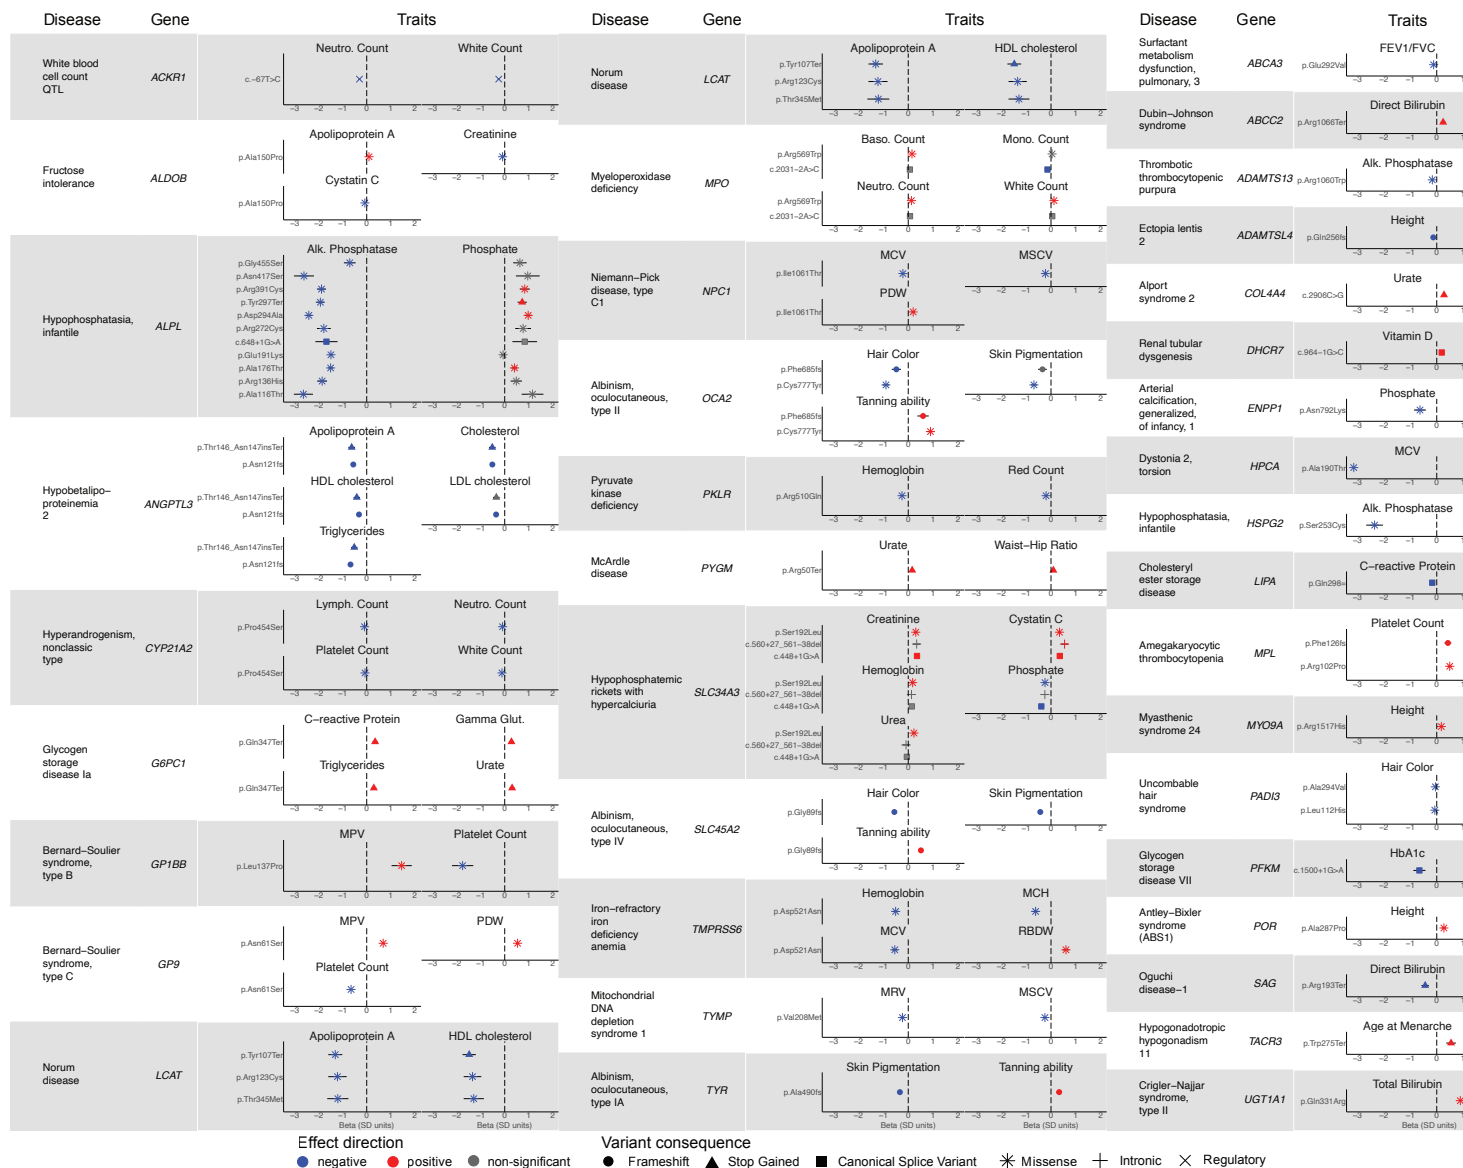

517 **Figure 2. Cystic fibrosis carriers show mitigated phenotypes, but spinal muscular atrophy**  
518 **carriers do not.** (a) Carriers with the *CFTR* Phe508del inframe deletion exhibit increased risk of  
519 several mitigated disease phenotypes (data points, odds ratios; error bars, 95% CIs). (b) Genotyping  
520 for SMA carrier status using exome sequencing data from the UK Biobank. *SMN1* and *SMN2* copy  
521 numbers were estimated based on sequencing read depth, and SMA carriers (orange) were identified  
522 as those individuals estimated to have one functional copy of *SMN1* (with a deletion allele on the  
523 homologous chromosome). (c) *SMN1* deletion carriers did not display evidence of changes in any of  
524 three traits related to neuromuscular function (data points, mean values in units of standard deviations;  
525 error bars, 95% CIs).  
526

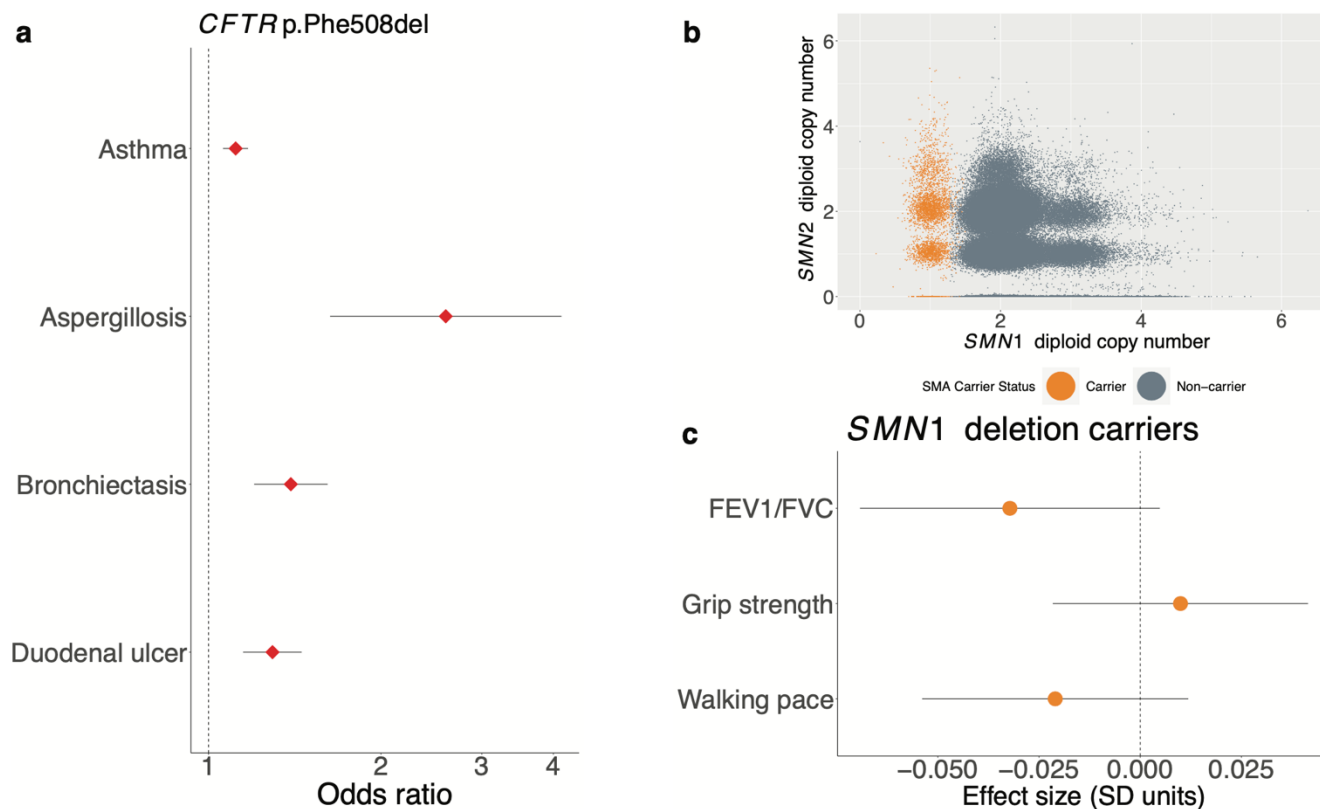

527 **Figure 3. Common variants on haplotypes opposite recessive alleles in carriers of two**  
 528 **Mendelian diseases do not appear to modify penetrance of carrier phenotypes.** (a) The “modified  
 529 penetrance” model of Castel *et al.* (2018) posits that *cis*-eQTLs can increase or decrease severity of a  
 530 deleterious variant by modulating the quantity of functional protein produced by the opposite haplotype.  
 531 (b) To test this hypothesis, we examined opposite haplotypes (blue chromosomes) in heterozygous  
 532 carriers of recessive disease variants (orange star on yellow chromosome). We tested variants carried  
 533 on these opposite haplotypes for association with mitigated phenotypes observed in carriers. (c,d)  
 534 Manhattan plots showing association test results for variants on the opposite haplotype of deleterious  
 535 variants in *FLG* and *CFTR* with asthma (the phenotype most strongly associated with carrier status in  
 536 each case). No association reached Bonferroni significance (red line). (e,f) Power analyses for the tests  
 537 conducted in c,d indicate that these tests were well-powered to detect common variant effects with  
 538 odds ratios >1.2.  
 539

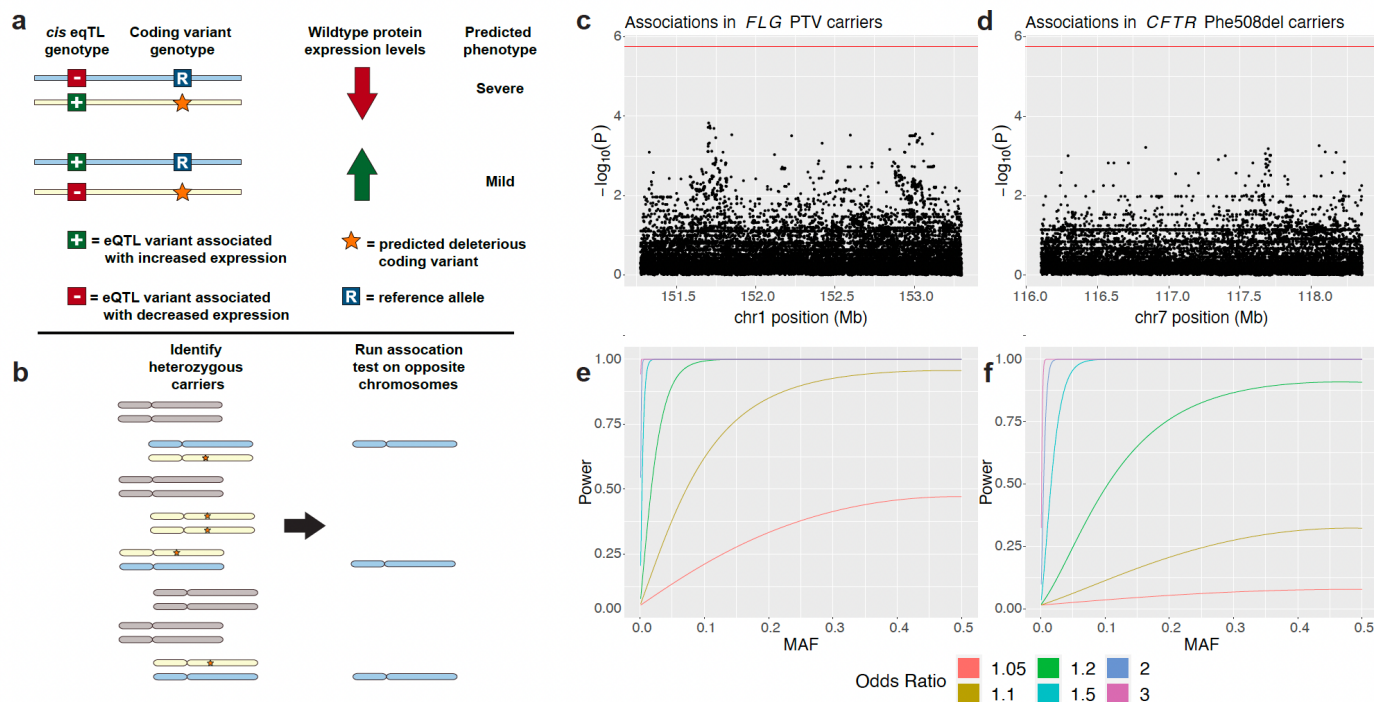



540 **Tables**

541

542 **Table 1. Carriers of Mendelian recessive disease variants exhibit increased risk of less-severe**  
 543 **disease phenotypes.** Odds ratios and p-values are reported for the five associations that reached  
 544 Bonferroni significance.  
 545

| Recessive disease association                            | ClinVar reported variant |                  |                |          | Disease association in carriers                   | Trait category                                           | OR (95% CI)          | P-Value  |
|----------------------------------------------------------|--------------------------|------------------|----------------|----------|---------------------------------------------------|----------------------------------------------------------|----------------------|----------|
|                                                          | Gene                     | Variant          | Variant impact | MAF      |                                                   |                                                          |                      |          |
| Alport syndrome 2                                        | <i>COL4A4</i>            | 2:227917083:G:C  | stop gained    | 6.16E-04 | Recurrent and persistent haematuria (N02)         | Genitourinary system disorders                           | 10.47 (5.17-21.2)    | 6.75E-11 |
| Thyroid dysmorphogenesis 3                               | <i>TG</i>                | 8:133894854:C:T  | stop gained    | 6.38E-04 | Other hypothyroidism (E03)                        | Endocrine, nutritional and metabolic diseases            | 2.20 (1.68-2.88)     | 9.72E-09 |
| Sickle cell anemia                                       | <i>HBB</i>               | 11:5248233:CAG:C | frameshift     | 2.15E-05 | Thalassaemia (D56)                                | Blood, blood-forming organs and certain immune disorders | 3,183 (440-23,030)   | 1.36E-15 |
| Albinism, oculo-cutaneous, type IA                       | <i>TYR</i>               | 11:88961072:C:A  | missense       | 1.10E-03 | Disorders of aromatic amino-acid metabolism (E70) | Endocrine, nutritional and metabolic diseases            | 63.27 (16.33-245.10) | 1.94E-09 |
| Retinitis pigmentosa 80 & short rib thoracic dysplasia 9 | <i>IFT140</i>            | 16:1607935:C:A   | splice donor   | 5.11E-04 | Cystic kidney disease (Q61)                       | Congenital disruptions and chromosomal abnormalities     | 18.42 (8.47-40.05)   | 1.98E-13 |
