# Supplementary material for: A spectrum of recessiveness among Mendelian disease variants in UK Biobank
Source: bioRxiv or medRxiv preprint supplement (doi:10.1101/2021.12.13.21267756), 2021-12-14

**Figure S1. Comparison between odds ratios for mitigated disease phenotypes in CF carriers in UK Biobank versus results from Miller *et al.* (2020).** Results for this analysis of UK Biobank are shown as red circles; results from Miller *et al.* are shown as black triangles (data points, odds ratio; error bars, 95% CIs).

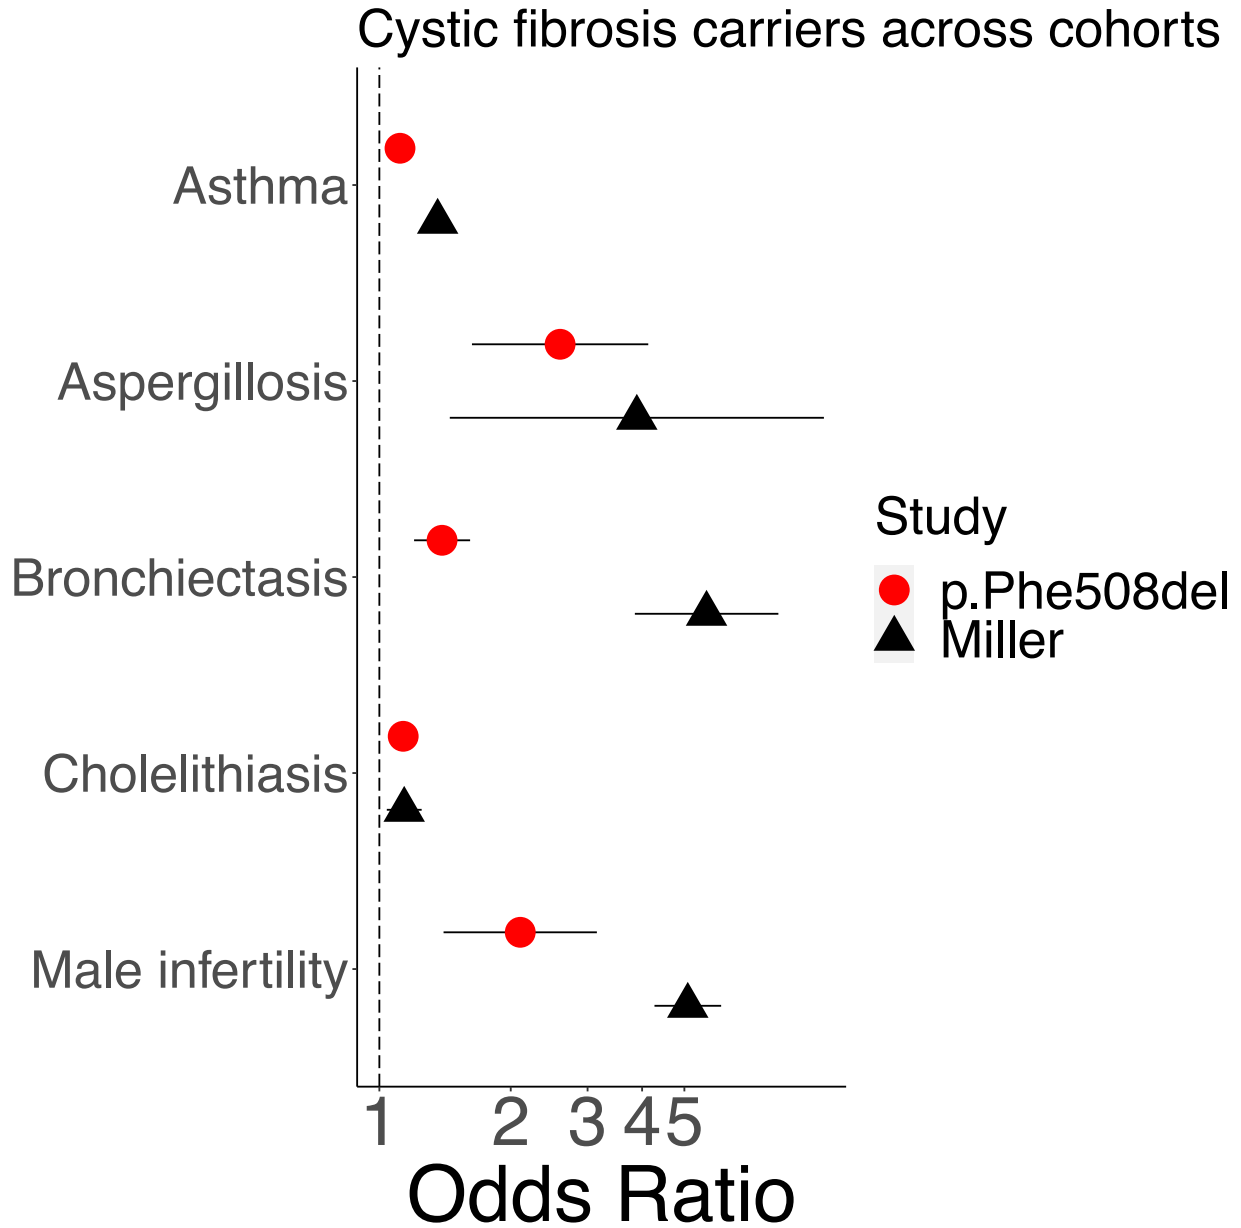

Supplement: Supplementary file [file media-1.pdf]
